# Supplementary material
Source: publisher figshare collection journal article supplement (https://springernature.figshare.com/ndownloader/files/21504606)
Supplement: Supplementary file 1 [file 21504606]

Table S**6. The promoter sequences of the two proteinase inhibitors**

> PPII-B

TATTAGATAGTCTCATTGCTCGAGAACGAGCAAGAGTCTAAGTGTGGGGTGTTGATGATTATCTTAAAGTATATATATTTTTATGTATATCGCCTCATATTTACTTTTGTTTCGTGAATTTGAGATGTTAAATGTTATGATTTATATTAATTTGAAAAGTTTTTACTTGTAGAAATGATTCGGGAGCAATTGGGGTCGAAACGCGCAAGATATTGAGCCAAAATGAACAAAATCAAAAAAATAGGCATTTGGGCGCCACATGTGGCGTTGGAGGCAGAAATGATAATTTGGGCAGCGCCCTGGTGGGCACCTGGCGCTGGGCTGGGTGCCGTTGACGTCATTTTTGTCCTATTTTGCCTGAGACTCGGTTTATTCGGTCCTAGACCTATCAAACTCGTATTAAAGAAAGACTAAGCCTATTTTTCGAGGGGAGACGCCACTTTGGAGGAAAAATACACACAAGAAACATCCCCAAGCAATAACATCTCAAATTTATTCATCTTTTCTAGTATTTTCCATTTATTCAAAACTTATGCAACTATTTGCTAGTATATGAATGGCTAAAAACGTATTGTTCTAGGGTCATGGGTGAAACATGAATGTTGTTTGAGGTTTAATCAAACGAAGTTGATTTTATCATATTCGGATGTTTATTTAATTATATTTTTAAGTATTTTGCTGAGTAGCTAACTGTGAAGTACTATCTACGAATCTAGAGTTAAACTCAAAAGTGGGAACTCTAGATTGCTTATAGAATTAAATAGAGCAAGTTCTTGAACCTGGCAATCGGGAAACATATTCACAATTAGGATAGACATATACCTAATAGTCTTGCTTGGTTGAAATACAGGAATTGTAAATGCATTCGTGTTAATCTTAATTCCATAGATATATGGGCATTAAGTTAACTTGAATAGGCGAGTAAGGACTCGACAGATTCTTATGAGTAATACCAACCCCGTCAATCAACAATCCAGATAAATCAATTAGCTATCTTTTGCCAAGAACACAATACGGTTGTTATCTAGCATGTGACCTTGGAATATTCGCCCCTACTGATTGTTATTTGAAATTGTTATTTGTTCTGTTGCTTTCTAGTTAATTCATTGCTTGATAGTTTTAGGTAGTAAATTAGTTACGTTTATATTTTGTGAAAAATCTCTTCGATCGATAAGTTAATTGAGTTTAAATCAGTCAACAGTTAATCACAAATTTTCGTGGGAACGATACTTTAGATTTAATGGACTTTATTATTTAATGATAACGTGCACTTGTATAAGTGTTTTTGGTGCAACAGTCTAGCCATAATACAAAGCACACTTTTATGATAAAGCCTATTCTTGACGTAAGTTTGTCTCATGTATATGGATCATTTGCTTGCACGGTGTTGGTTCTTTTTTGAATAAAAAGAATATACACGGTATTTTGTGAACATTCAACAATAATACATTTTTTTAAGTGAATTCGTACAACAAGAACAACAAATAAAAGAAATTAACTAATTGACATGGTTAGGGACAACTCATCAAGCTTATCTTCAACATTAAATTAGTCTACTATGGTTGCTTAAACAAACAAGTATACCATGTAATTTCGTCACAAACTCTCCTATAAATAACCTCAAGACAACCAAATGAATCTAACACATCAAACCAAGGAAAATTAGATAAAATTAAAGACAATGGCGAAGTTAGCTCTCGTGGTTGCTTTCTTGCTTCTTGTATCACGTTAGCTCTTATTTCCCTCTCTCATTAATTTCATATTTGTTTTTAAGCACTTTTTTCATGTTTATTTCTATTTATTATTCCAAAAAAAAATTAATGTAAATTATTTTATGAACAGTTTTTCAACCTCTCACGGCTCAATCCAGTTGCCCAGGTTTGGTTTTTACTCTTCATCTCCTACTTCTTAATTCCTATAGATATTACCTAATTTTTTTGTGCATAAATTTCCTATTCTTTTTTCACTAGAATTCATCTCTCATTATATATATAAATTATA

> PKTI1

TAAACCGATAAACCGCCCAGTAACCGCCCGATAAGAGCTAACCCGATACCAATTCGCCCGATATCTTATTGGGTGGCTAACGGATGAATTCATTTAAAAGCCGATAACCGTTAAGCCAAACCGTTAGAGTAAAAAGCCGCCCAATCCGCCCAATGAACACCCCTATCCGCTATGATTTAGCTGAACCTACTAGTATTTTTTTTAAACATTATATTTGTCTTAAAATTAATTTAAAATATATAAATTATTAAATTAAAACTCAATAACTTAAATTGAATGACAATCTTCATATTCTAACTCCACCTTAATCCATGTACGTACACTTGTACAAGAAGCTTACGTCTCTTAATATAGGTTCAACATTTGAAAAGCTGAGTGCAAAATTCAAATATGTACATGAAAGTTCAAATTGAAGTTCAATAAGTTATTGCTTTGGCTAAGCTTTTCCCATTGTTTAATGTGTAAATGTAAGGCATGCATGGGTATTTACAGAAAAAATGACAAAATATTTTTGTAACTACTGCTTTATAAAAGACAACGGCTAGAAATTTAAAGTTTATAGTCAATTCGATCCATTTATCTGAAAAAGAAAAACCATTGCAGGGAATAATACTTTTCAAACTACTCCATATAATACGAAACCTTTATCCAGTTCTATAAATAGCGCTGCTTCGCTAAGTTTATTGTATCCATTCACAAGTTAGTTTAACAA

Notes: PPII-B indicated the promoter of the PII-B gene,PKTI1 indicated the promoter of the KTI gene. Due to the quality of the *N. benthamiana* genome, the promoter of KTI can only extract the above sequences.
